# Supplementary material for: One-Seventh of Patients with COVID-19 Had Olfactory and Gustatory Abnormalities as Their Initial Symptoms: A Systematic Review and Meta-Analysis
Source: PubMed Central journal article supplement (PMC7554793; doi:10.3390/life10090158), 2020-08-22
Supplement: life-10-00158-s001.pdf [file life-10-00158-s001.pdf]

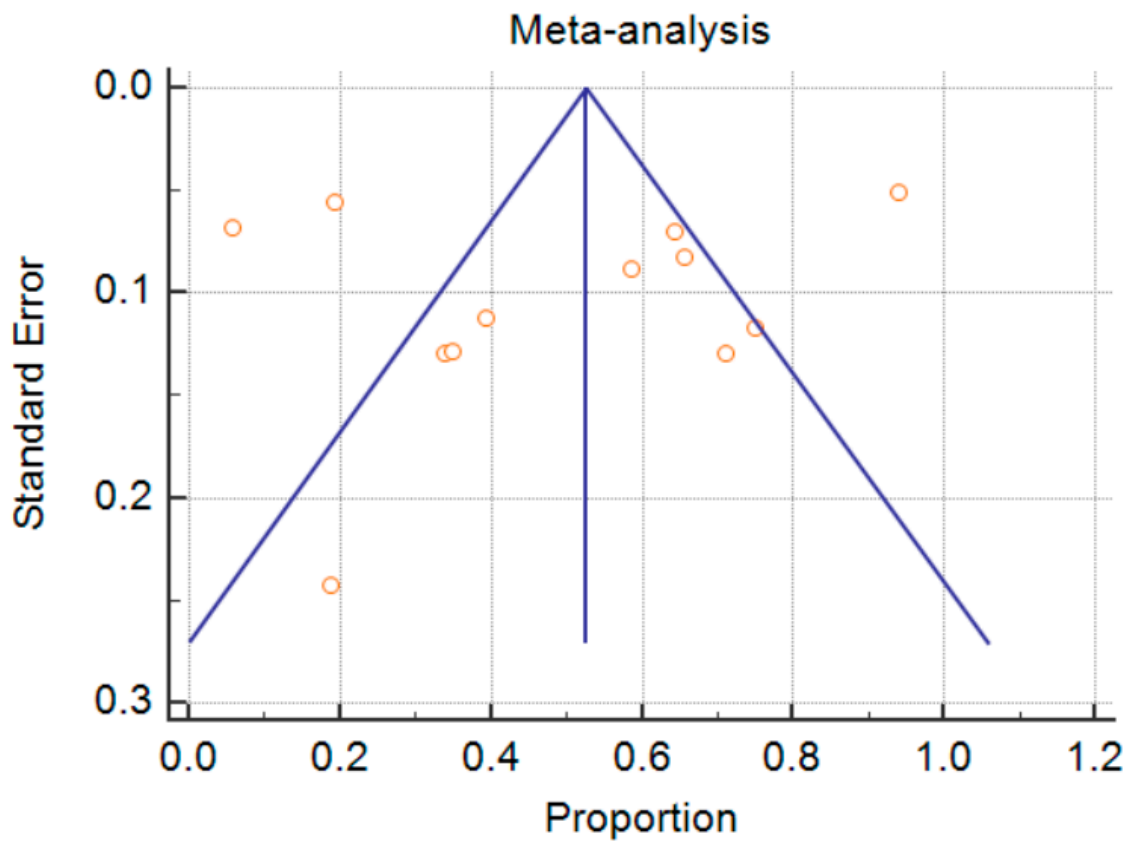

**Supplementary Figure S1.** funnel plot of enrolled studies investigating the prevalence of olfactory and gustatory abnormalities.

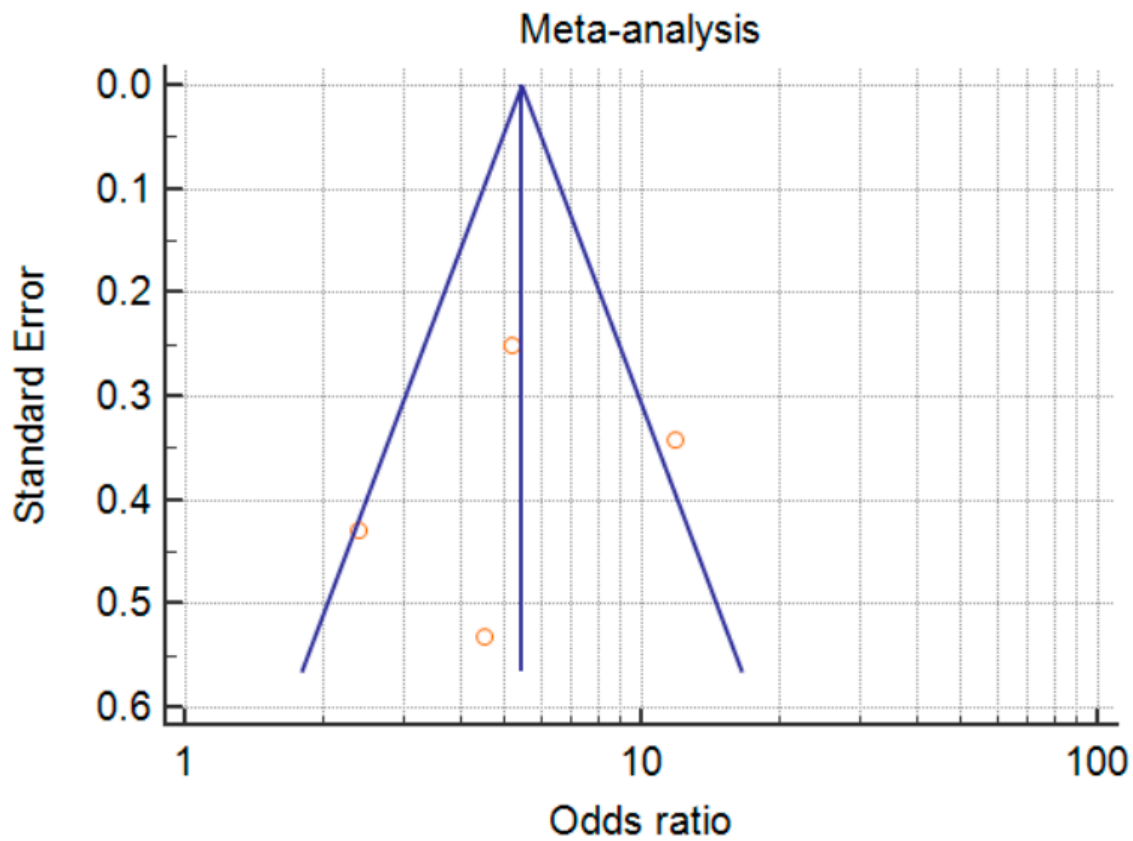

**Supplementary Figure S2.** funnel plot of enrolled studies investigating the prevalence of olfactory and gustatory abnormalities as initial symptoms.

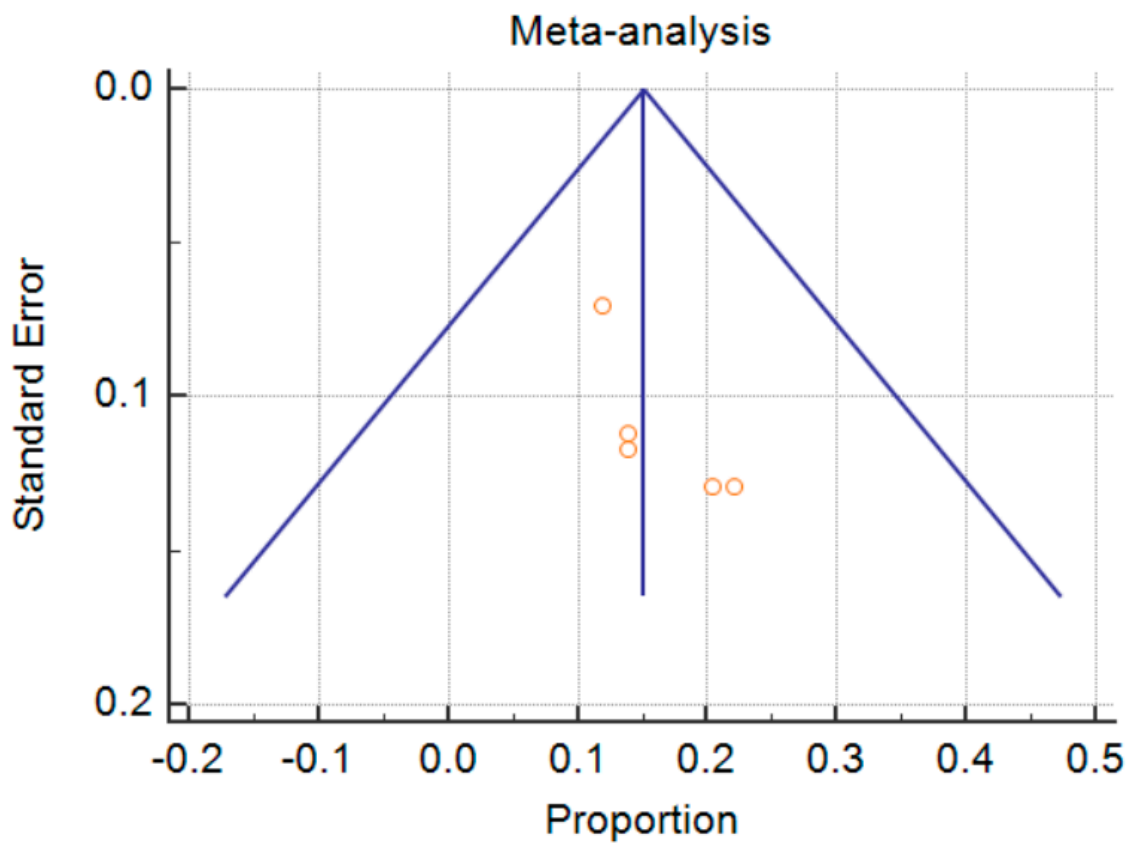

**Supplementary Figure S3.** funnel plot of enrolled studies investigating the prevalence of olfactory and gustatory abnormalities between COVID-19 and controls.
